# Supplementary material for: Difluoromethylation of (hetero)aryl chlorides with chlorodifluoromethane catalyzed by nickel
Source: PubMed Central journal article supplement (PMC5862906; doi:10.1038/s41467-018-03532-1), 2018-03-21
Supplement: 41467_2018_3532_MOESM2_ESM.pdf [file 41467_2018_3532_MOESM2_ESM.pdf]

## Description of Additional Supplementary Files

File Name: Supplementary Data 1

Description: X-ray crystal structure of nickel complex C1.
